# Supplementary material
Source: Springer Nature journal article supplement (https://www.springermedizin.de/resource/supplementary/12885_2013_5253_MOESM5_ESM.pdf/9464546)

**MOCK****Si-Control****Si-UBE2C****CNE1**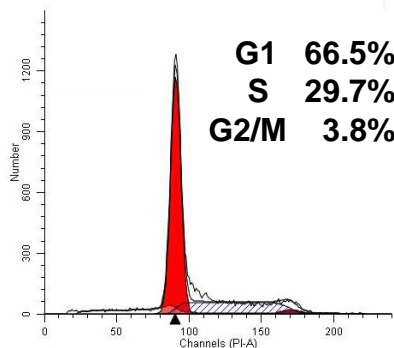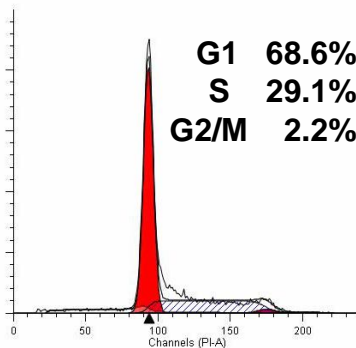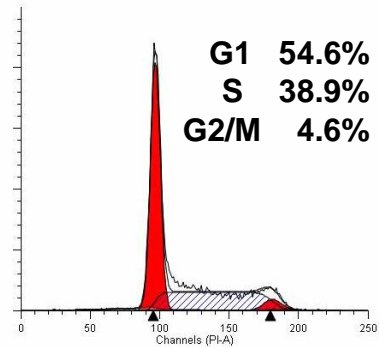**CNE2Z**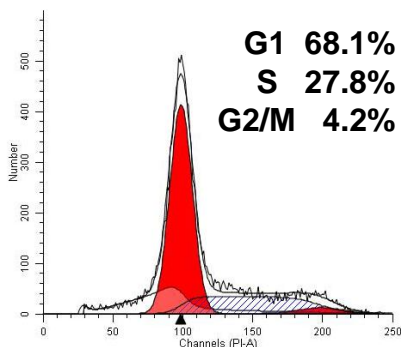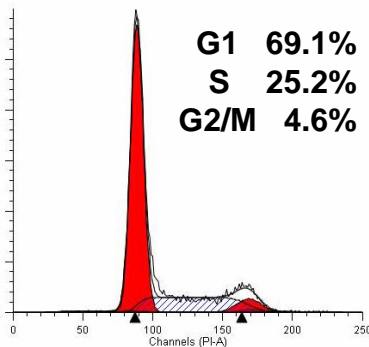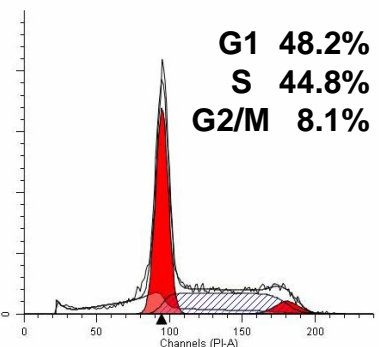**C666-1**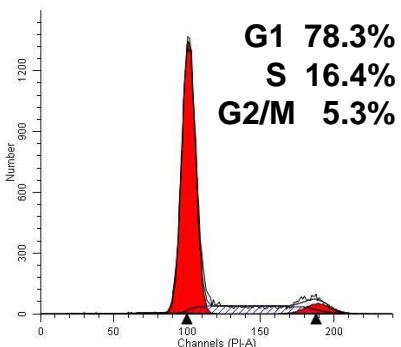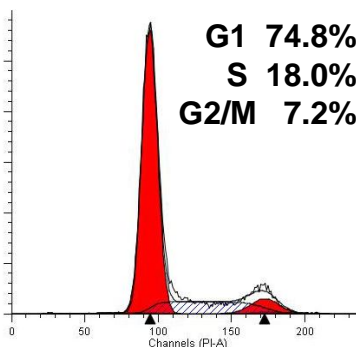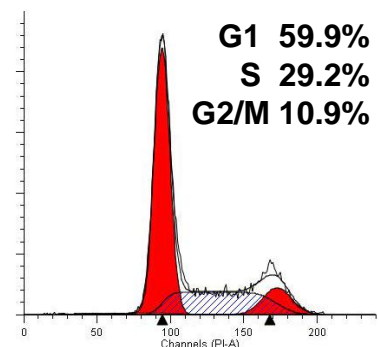**NP-69**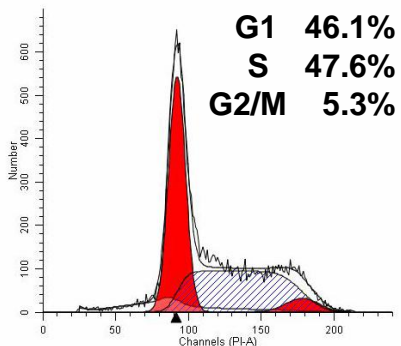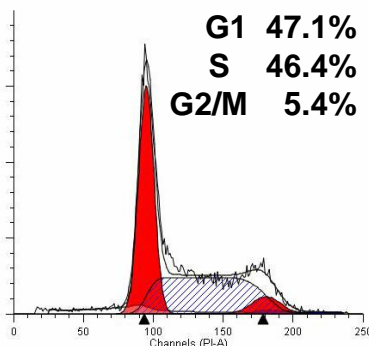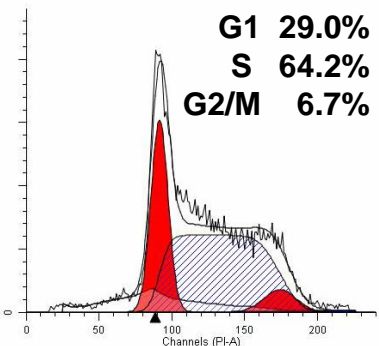

Supplement: MOESM5 [file 9464546]
